# Supplementary material for: Double rolling circle replication (DRCR) is recombinogenic
Source: PubMed Central journal article supplement (PMC3147054; doi:10.1111/j.1365-2443.2011.01507.x), 2011-05
Supplement: gtc0016-0503-SD1.pdf [file gtc0016-0503-SD1.pdf]

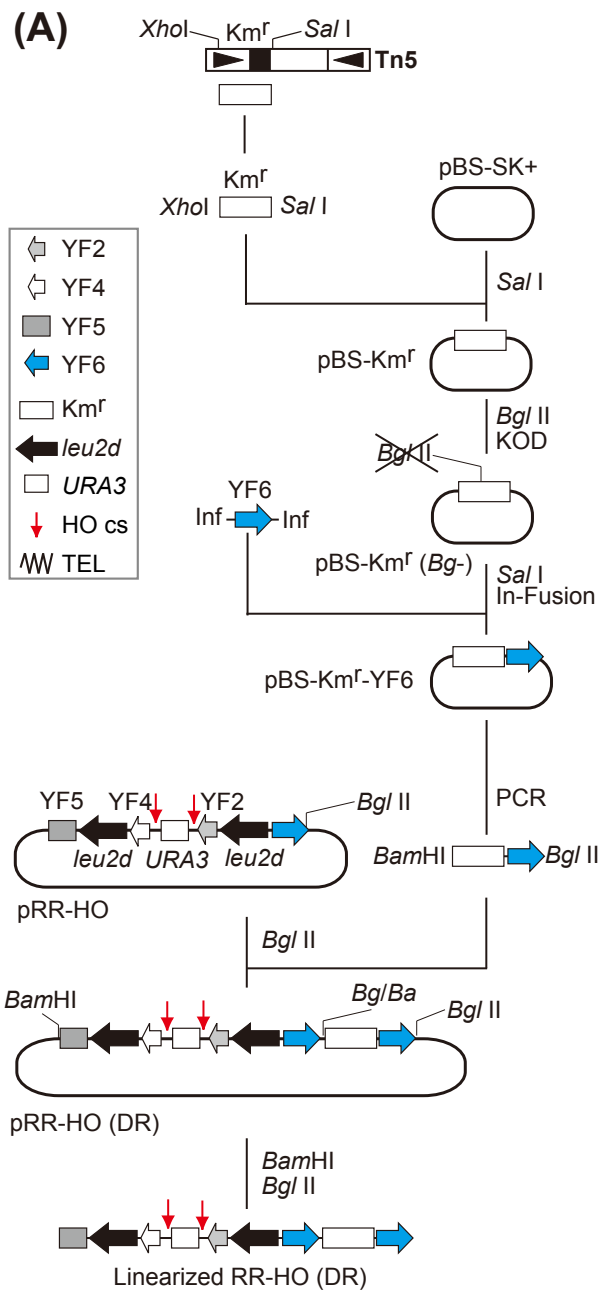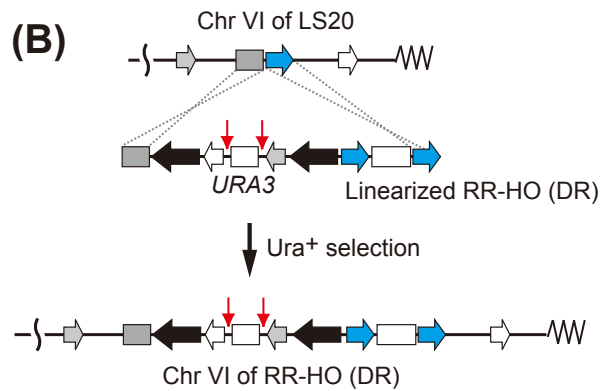

**Figure S1**
